# Supplementary material for: Adaptation of Phenylalanine and Tyrosine Catabolic Pathway to Hibernation in Bats
Source: PLoS One. 2013 Apr 19;8(4):e62039. doi: 10.1371/journal.pone.0062039 (PMC3631164; doi:10.1371/journal.pone.0062039)
Supplement: Figure S6 — Structure based sequence alignment of HGD and FAH. Amino acid sequences of HGD and FAH from hibernating (H) and non-hibernating (N) bats and each of their corresponding template of human (Homo sapiens), rat (Rattus norvegicus), or mouse (Mus musculus) are aligned. Amino acids that are conserved among hibernating bats but are different or diverged among non-hibernating ones are colored in blue and red, respectively. Orange color indicates positions conserved in non-hibernating bats but diverged among hibernating bats. (A) The active sites of HGD composed of residues F282-T299, P320-K327, and M368-K385 are denoted with the orange line. Residue H269 is critical for the trimerization of HGD and activation of the enzyme. Positions that have been reported to have missense or nonsense mutations leading to human alkaptonuria (AKU) are indicated in triangles. (B) Amino acids involved in the catalytic activity of FAH are indicated in green, in which D126, E199, E201, and D233 are responsible for binding of a metal ion, and T350 is for binding of a water molecule. The oxyanion hole formed by the side chains of R237, Q240, and K253 stabilizes the transition state during enzymatic reaction. The H133/E364 catalytic dyad is drawn in pink. Residues M149-Y190 denoted by the gray line are located in the hydrophobic region of C-terminus which is buried in the inter surface of the FAH dimer. The amino acids indicated in triangles are the ones known to cause type 1 tyrosinemia in humans if they are mutated. (PDF) [file pone.0062039.s006.pdf]

## A. HGD

|                         |  |                                                                                                     |     |     |     |                                                            |     |     |     |        |     |
|-------------------------|--|-----------------------------------------------------------------------------------------------------|-----|-----|-----|------------------------------------------------------------|-----|-----|-----|--------|-----|
|                         |  | 10                                                                                                  | 20  | 30  | 40  | 50                                                         | 60  | 70  | 80  | 90     | 100 |
| Homo sapiens            |  | MAELKYISGFGNCESSDFRCPSGLPEQGNQVPCPNLYAEQLSGSAFTCPSTNKRKSWLYRILPSVSHKPFESIDQGHVTNNWDEVDPDPNQLRWKPF   |     |     |     |                                                            |     |     |     |        |     |
| <i>B. beijingensis</i>  |  | -----                                                                                               |     |     |     | QLSGSAFTCPSTNKRKSWLYRILPSVSHKPFESTDQGHVTNNWDEVDPDPNQLRWKPF |     |     |     |        |     |
| <i>H. armiger</i>       |  | -----                                                                                               |     |     |     | QLSGSAFTCPSTNKRKSWLYRILPSVSHKPFESTDQGHVTNNWDEVDPDPNQLRWKPF |     |     |     |        |     |
| <i>M. fuliginosus</i>   |  | -----                                                                                               |     |     |     | QLSGSAFTCPSTNKRKSWLYRILPSVSHKPFESTDQGHVTNNWDEVDPDPNQLRWKPF |     |     |     |        |     |
| <i>M. lucifugus</i>     |  | -----                                                                                               |     |     |     | QLSGSAFTCPSTNKRKSWLYRILPSVSHKPFESTDQGHVTNNWDEVDPDPNQLRWKPF |     |     |     |        |     |
| <i>H. ricketti</i>      |  | -----                                                                                               |     |     |     | QLSGSAFTCPSTNKRKSWLYRILPSVSHKPFESTDQGHVTNNWDEVDPDPNQLRWKPF |     |     |     |        |     |
| <i>P. abramus</i>       |  | -----                                                                                               |     |     |     | QLSGSAFTCPSTNKRKSWLYRILPSVSHKPFESTDQGHVTNNWDEVDPDPNQLRWKPF |     |     |     |        |     |
| <i>R. ferrumequinum</i> |  | -----                                                                                               |     |     |     | QLSGSAFTCPSTNKRKSWLYRILPSVSHKPFESTDQGHVTNNWDEVDPDPNQLRWKPF |     |     |     |        |     |
| <i>R. pearsoni</i>      |  | -----                                                                                               |     |     |     | QLSGSAFTCPSTNKRKSWLYRILPSVSHKPFESTDQGHVTNNWDEVDPDPNQLRWKPF |     |     |     |        |     |
| <i>C. sphinx</i>        |  | -----                                                                                               |     |     |     | QLSGSAFTCPSTNKRKSWLYRILPSVSHKPFESTDQGHVTNNWDEVDPDPNQLRWKPF |     |     |     |        |     |
| <i>N. vampyrus</i>      |  | MTLHVISGFGNCEASDEPRCPALPEQGNQVPCPNLYAEQLSGSAFTCPSTNKR-----                                          |     |     |     | -----                                                      |     |     |     | L-WKPF |     |
| <i>R. leschenaultii</i> |  | -----                                                                                               |     |     |     | QLSGSAFTCPSTNKRKSWLYRILPSVSHKPFESTDQGHVTNNWDEVDPDPNQLRWKPF |     |     |     |        |     |
|                         |  | 110                                                                                                 | 120 | 130 | 140 | 150                                                        | 160 | 170 | 180 | 190    | 200 |
| Homo sapiens            |  | EIPKASQKQKVDVFSGLHTLCCAGDIRSNNGLAVHIFLCNTSMGDRCFYNSDGDGLFIVPQKGLLIYTFEGKMLVQNEICVIQGRMFSVDVFEETRGIY |     |     |     |                                                            |     |     |     |        |     |
| <i>B. beijingensis</i>  |  | EIPKASQKQKVDVFSGLHTLCCAGDIRSNNGLAVHIFLCNTSMGDRCFYNSDGDGLFIVPQKGLLIYTFEGKMLVQNEICVIQGRMFSVDVFEETRGIY |     |     |     |                                                            |     |     |     |        |     |
| <i>H. armiger</i>       |  | EIPKASQKQKVDVFSGLHTLCCAGDIRSNNGLAVHIFLCNTSMGDRCFYNSDGDGLFIVPQKGLLIYTFEGKMLVQNEICVIQGRMFSVDVFEETRGIY |     |     |     |                                                            |     |     |     |        |     |
| <i>M. fuliginosus</i>   |  | EIPKASQKQKVDVFSGLHTLCCAGDIRSNNGLAVHIFLCNTSMGDRCFYNSDGDGLFIVPQKGLLIYTFEGKMLVQNEICVIQGRMFSVDVFEETRGIY |     |     |     |                                                            |     |     |     |        |     |
| <i>M. lucifugus</i>     |  | EIPKASQKQKVDVFSGLHTLCCAGDIRSNNGLAVHIFLCNTSMGDRCFYNSDGDGLFIVPQKGLLIYTFEGKMLVQNEICVIQGRMFSVDVFEETRGIY |     |     |     |                                                            |     |     |     |        |     |
| <i>H. ricketti</i>      |  | EIPKASQKQKVDVFSGLHTLCCAGDIRSNNGLAVHIFLCNTSMGDRCFYNSDGDGLFIVPQKGLLIYTFEGKMLVQNEICVIQGRMFSVDVFEETRGIY |     |     |     |                                                            |     |     |     |        |     |
| <i>P. abramus</i>       |  | EIPKASQKQKVDVFSGLHTLCCAGDIRSNNGLAVHIFLCNTSMGDRCFYNSDGDGLFIVPQKGLLIYTFEGKMLVQNEICVIQGRMFSVDVFEETRGIY |     |     |     |                                                            |     |     |     |        |     |
| <i>R. ferrumequinum</i> |  | EIPKASQKQKVDVFSGLHTLCCAGDIRSNNGLAVHIFLCNTSMGDRCFYNSDGDGLFIVPQKGLLIYTFEGKMLVQNEICVIQGRMFSVDVFEETRGIY |     |     |     |                                                            |     |     |     |        |     |
| <i>R. pearsoni</i>      |  | EIPKASQKQKVDVFSGLHTLCCAGDIRSNNGLAVHIFLCNTSMGDRCFYNSDGDGLFIVPQKGLLIYTFEGKMLVQNEICVIQGRMFSVDVFEETRGIY |     |     |     |                                                            |     |     |     |        |     |
| <i>C. sphinx</i>        |  | EIPKASQKQKVDVFSGLHTLCCAGDIRSNNGLAVHIFLCNTSMGDRCFYNSDGDGLFIVPQKGLLIYTFEGKMLVQNEICVIQGRMFSVDVFEETRGIY |     |     |     |                                                            |     |     |     |        |     |
| <i>N. vampyrus</i>      |  | EIPKASQKQKVDVFSGLHTLCCAGDIRSNNGLAVHIFLCNTSMGDRCFYNSDGDGLFIVPQKGLLIYTFEGKMLVQNEICVIQGRMFSVDVFEETRGIY |     |     |     |                                                            |     |     |     |        |     |
| <i>R. leschenaultii</i> |  | EIPKASQKQKVDVFSGLHTLCCAGDIRSNNGLAVHIFLCNTSMGDRCFYNSDGDGLFIVPQKGLLIYTFEGKMLVQNEICVIQGRMFSVDVFEETRGIY |     |     |     |                                                            |     |     |     |        |     |
|                         |  | 210                                                                                                 | 220 | 230 | 240 | 250                                                        | 260 | 270 | 280 | 290    | 300 |
| Homo sapiens            |  | LEVYGVHVELDPLGPIGANGLANPRDFLPIVAVYEDRQVPGGTVVINKYQKGLFAAQKQVSPFNVMVANGNYTPYKYNLENFMVINAFAVDHADSIFTV |     |     |     |                                                            |     |     |     |        |     |
| <i>B. beijingensis</i>  |  | LEVYGVHVELDPLGPIGANGLANPRDFLPIVAVYEDRQVPGGTVVINKYQKGLFAAQKQVSPFNVMVANGNYTPYKYNLENFMVINAFAVDHADSIFTV |     |     |     |                                                            |     |     |     |        |     |
| <i>H. armiger</i>       |  | LEVYGVHVELDPLGPIGANGLANPRDFLPIVAVYEDRQVPGGTVVINKYQKGLFAAQKQVSPFNVMVANGNYTPYKYNLENFMVINAFAVDHADSIFTV |     |     |     |                                                            |     |     |     |        |     |
| <i>M. fuliginosus</i>   |  | LEVYGVHVELDPLGPIGANGLANPRDFLPIVAVYEDRQVPGGTVVINKYQKGLFAAQKQVSPFNVMVANGNYTPYKYNLENFMVINAFAVDHADSIFTV |     |     |     |                                                            |     |     |     |        |     |
| <i>M. lucifugus</i>     |  | LEVYGVHVELDPLGPIGANGLANPRDFLPIVAVYEDRQVPGGTVVINKYQKGLFAAQKQVSPFNVMVANGNYTPYKYNLENFMVINAFAVDHADSIFTV |     |     |     |                                                            |     |     |     |        |     |
| <i>H. ricketti</i>      |  | LEVYGVHVELDPLGPIGANGLANPRDFLPIVAVYEDRQVPGGTVVINKYQKGLFAAQKQVSPFNVMVANGNYTPYKYNLENFMVINAFAVDHADSIFTV |     |     |     |                                                            |     |     |     |        |     |
| <i>P. abramus</i>       |  | LEVYGVHVELDPLGPIGANGLANPRDFLPIVAVYEDRQVPGGTVVINKYQKGLFAAQKQVSPFNVMVANGNYTPYKYNLENFMVINAFAVDHADSIFTV |     |     |     |                                                            |     |     |     |        |     |
| <i>R. ferrumequinum</i> |  | LEVYGVHVELDPLGPIGANGLANPRDFLPIVAVYEDRQVPGGTVVINKYQKGLFAAQKQVSPFNVMVANGNYTPYKYNLENFMVINAFAVDHADSIFTV |     |     |     |                                                            |     |     |     |        |     |
| <i>R. pearsoni</i>      |  | LEVYGVHVELDPLGPIGANGLANPRDFLPIVAVYEDRQVPGGTVVINKYQKGLFAAQKQVSPFNVMVANGNYTPYKYNLENFMVINAFAVDHADSIFTV |     |     |     |                                                            |     |     |     |        |     |
| <i>C. sphinx</i>        |  | LEVYGVHVELDPLGPIGANGLANPRDFLPIVAVYEDRQVPGGTVVINKYQKGLFAAQKQVSPFNVMVANGNYTPYKYNLENFMVINAFAVDHADSIFTV |     |     |     |                                                            |     |     |     |        |     |
| <i>N. vampyrus</i>      |  | LEVYGVHVELDPLGPIGANGLANPRDFLPIVAVYEDRQVPGGTVVINKYQKGLFAAQKQVSPFNVMVANGNYTPYKYNLENFMVINAFAVDHADSIFTV |     |     |     |                                                            |     |     |     |        |     |
| <i>R. leschenaultii</i> |  | LEVYGVHVELDPLGPIGANGLANPRDFLPIVAVYEDRQVPGGTVVINKYQKGLFAAQKQVSPFNVMVANGNYTPYKYNLENFMVINAFAVDHADSIFTV |     |     |     |                                                            |     |     |     |        |     |
|                         |  | 310                                                                                                 | 320 | 330 | 340 | 350                                                        | 360 | 370 | 380 | 390    | 400 |
| Homo sapiens            |  | LTAKSRLPGVAIAIDVFIPPRWGVAADKTRFPYTHRCMSFEMGLIGHYEAKEGFLPGGSLHSTMTPHGPDADCFEKASKAKLPERIADGTMAFMF     |     |     |     |                                                            |     |     |     |        |     |
| <i>B. beijingensis</i>  |  | LTAKSRLPGVAIAIDVFIPPRWGVAADKTRFPYTHRCMSFEMGLIGHYEAKEGFLPGGSLHSTMTPHGPDADCFEKASKAKLPERIADGTMAFMF     |     |     |     |                                                            |     |     |     |        |     |
| <i>H. armiger</i>       |  | LTAKSRLPGVAIAIDVFIPPRWGVAADKTRFPYTHRCMSFEMGLIGHYEAKEGFLPGGSLHSTMTPHGPDADCFEKASKAKLPERIADGTMAFMF     |     |     |     |                                                            |     |     |     |        |     |
| <i>M. fuliginosus</i>   |  | LTAKSRLPGVAIAIDVFIPPRWGVAADKTRFPYTHRCMSFEMGLIGHYEAKEGFLPGGSLHSTMTPHGPDADCFEKASKAKLPERIADGTMAFMF     |     |     |     |                                                            |     |     |     |        |     |
| <i>M. lucifugus</i>     |  | LTAKSRLPGVAIAIDVFIPPRWGVAADKTRFPYTHRCMSFEMGLIGHYEAKEGFLPGGSLHSTMTPHGPDADCFEKASKAKLPERIADGTMAFMF     |     |     |     |                                                            |     |     |     |        |     |
| <i>H. ricketti</i>      |  | LTAKSRLPGVAIAIDVFIPPRWGVAADKTRFPYTHRCMSFEMGLIGHYEAKEGFLPGGSLHSTMTPHGPDADCFEKASKAKLPERIADGTMAFMF     |     |     |     |                                                            |     |     |     |        |     |
| <i>P. abramus</i>       |  | LTAKSRLPGVAIAIDVFIPPRWGVAADKTRFPYTHRCMSFEMGLIGHYEAKEGFLPGGSLHSTMTPHGPDADCFEKASKAKLPERIADGTMAFMF     |     |     |     |                                                            |     |     |     |        |     |
| <i>R. ferrumequinum</i> |  | LTAKSRLPGVAIAIDVFIPPRWGVAADKTRFPYTHRCMSFEMGLIGHYEAKEGFLPGGSLHSTMTPHGPDADCFEKASKAKLPERIADGTMAFMF     |     |     |     |                                                            |     |     |     |        |     |
| <i>R. pearsoni</i>      |  | LTAKSRLPGVAIAIDVFIPPRWGVAADKTRFPYTHRCMSFEMGLIGHYEAKEGFLPGGSLHSTMTPHGPDADCFEKASKAKLPERIADGTMAFMF     |     |     |     |                                                            |     |     |     |        |     |
| <i>C. sphinx</i>        |  | LTAKSRLPGVAIAIDVFIPPRWGVAADKTRFPYTHRCMSFEMGLIGHYEAKEGFLPGGSLHSTMTPHGPDADCFEKASKAKLPERIADGTMAFMF     |     |     |     |                                                            |     |     |     |        |     |
| <i>N. vampyrus</i>      |  | LTAKSRLPGVAIAIDVFIPPRWGVAADKTRFPYTHRCMSFEMGLIGHYEAKEGFLPGGSLHSTMTPHGPDADCFEKASKAKLPERIADGTMAFMF     |     |     |     |                                                            |     |     |     |        |     |
| <i>R. leschenaultii</i> |  | LTAKSRLPGVAIAIDVFIPPRWGVAADKTRFPYTHRCMSFEMGLIGHYEAKEGFLPGGSLHSTMTPHGPDADCFEKASKAKLPERIADGTMAFMF     |     |     |     |                                                            |     |     |     |        |     |
|                         |  | 410                                                                                                 | 420 | 430 | 440 |                                                            |     |     |     |        |     |
| Homo sapiens            |  | ESSLSLAVTKWGLKASRCLDENYHKCWEPLKSHFTPSNSRPAEPN                                                       |     |     |     |                                                            |     |     |     |        |     |
| <i>B. beijingensis</i>  |  | ESSLSLAVTKWGLKASRCLDENYHKCWEPLKSHFTPSNSRPAEPN                                                       |     |     |     |                                                            |     |     |     |        |     |
| <i>H. armiger</i>       |  | ESSLSMAVTKWGLKTSNSLDDENYKCEWLKSHFTSNSR-----                                                         |     |     |     |                                                            |     |     |     |        |     |
| <i>M. fuliginosus</i>   |  | ESSLSMAVTKWGLKTSNSLDDENYKCEWLKSHFTSNSR-----                                                         |     |     |     |                                                            |     |     |     |        |     |
| <i>M. lucifugus</i>     |  | ESSLSMAVTKWGLKTSNSLDDENYKCEWLKSHFTSNSR-----                                                         |     |     |     |                                                            |     |     |     |        |     |
| <i>H. ricketti</i>      |  | ESSLSMAVTKWGLKTSNSLDDENYKCEWLKSHFTSNSR-----                                                         |     |     |     |                                                            |     |     |     |        |     |
| <i>P. abramus</i>       |  | ESSLSMAVTKWGLKTSNSLDDENYKCEWLKSHFTSNSR-----                                                         |     |     |     |                                                            |     |     |     |        |     |
| <i>R. ferrumequinum</i> |  | ESSLSMAVTKWGLKTSNSLDDENYKCEWLKSHFTSNSR-----                                                         |     |     |     |                                                            |     |     |     |        |     |
| <i>R. pearsoni</i>      |  | ESSLSMAVTKWGLKTSNSLDDENYKCEWLKSHFTSNSR-----                                                         |     |     |     |                                                            |     |     |     |        |     |
| <i>C. sphinx</i>        |  | ESSLSMAVTKWGLKTSNSLDDENYKCEWLKSHFTSNSR-----                                                         |     |     |     |                                                            |     |     |     |        |     |
| <i>N. vampyrus</i>      |  | ESSLSMAVTKWGLKTSNSLDDENYKCEWLKSHFTSNSR-----                                                         |     |     |     |                                                            |     |     |     |        |     |
| <i>R. leschenaultii</i> |  | ESSLSMAVTKWGLKTSNSLDDENYKCEWLKSHFTSNSR-----                                                         |     |     |     |                                                            |     |     |     |        |     |

## B. FAH

|                  |  |                                                                                                    |     |     |     |                                                              |     |     |     |     |     |
|------------------|--|----------------------------------------------------------------------------------------------------|-----|-----|-----|--------------------------------------------------------------|-----|-----|-----|-----|-----|
|                  |  | 10                                                                                                 | 20  | 30  | 40  | 50                                                           | 60  | 70  | 80  | 90  | 100 |
| Homo sapiens     |  | MSFIPVAEDSDFFHNLPGYGFSTRGPPRRIGVAIGDQILDLSIKHLFTGPVLSKHQDVFQDPTLNSFMGLQAAWKEARAFVLQNLSSAQARLRDD    |     |     |     |                                                              |     |     |     |     |     |
| Mus musculus     |  | MSFIPVAEDSDFFIQLNLPGYGFSTQSNPKPRIGVAIGDQILDLSIKHLFTGPVLSKHQDVFQDPTLNSFMGLQAAWKEARAFVLQNLSSAQARLRDD |     |     |     |                                                              |     |     |     |     |     |
| H. armiger       |  | -----                                                                                              |     |     |     | DQILDLSIKHLFTGPVLSKHQDVFQDPTLNSFMGLQAAWKEARAFVLQNLSSAQARLRDD |     |     |     |     |     |
| M. fuliginosus   |  | -----                                                                                              |     |     |     | DQILDLSIKHLFTGPVLSKHQDVFQDPTLNSFMGLQAAWKEARAFVLQNLSSAQARLRDD |     |     |     |     |     |
| M. lucifugus     |  | -----                                                                                              |     |     |     | DQILDLSIKHLFTGPVLSKHQDVFQDPTLNSFMGLQAAWKEARAFVLQNLSSAQARLRDD |     |     |     |     |     |
| H. ricketti      |  | -----                                                                                              |     |     |     | DQILDLSIKHLFTGPVLSKHQDVFQDPTLNSFMGLQAAWKEARAFVLQNLSSAQARLRDD |     |     |     |     |     |
| P. ferrumequinum |  | -----                                                                                              |     |     |     | DQILDLSIKHLFTGPVLSKHQDVFQDPTLNSFMGLQAAWKEARAFVLQNLSSAQARLRDD |     |     |     |     |     |
| C. sphinx        |  | -----                                                                                              |     |     |     | DQILDLSIKHLFTGPVLSKHQDVFQDPTLNSFMGLQAAWKEARAFVLQNLSSAQARLRDD |     |     |     |     |     |
| N. vampyrus      |  | MSFIPVAEDSDFFHNLPGYGFSTRGPPRRIGVAIGDQILDLSIKHLFTGPVLSKHQDVFQDPTLNSFMGLQAAWKEARAFVLQNLSSAQARLRDD    |     |     |     |                                                              |     |     |     |     |     |
| R. leschenaultii |  | -----                                                                                              |     |     |     | DQILDLSIKHLFTGPVLSKHQDVFQDPTLNSFMGLQAAWKEARAFVLQNLSSAQARLRDD |     |     |     |     |     |
|                  |  | 110                                                                                                | 120 | 130 | 140 | 150                                                          | 160 | 170 | 180 | 190 | 200 |
| Homo sapiens     |  | ELRKCFAISQASATMHLPATIGDYTFYSSRQAHATNGVIMFRKENALMPNNLHLPVGYGRASSVVSQTPTRRPMQMRPDDSKPPVYGACKLLDMLEL  |     |     |     |                                                              |     |     |     |     |     |
| Mus musculus     |  | ELRKCFAISQASATMHLPATIGDYTFYSSRQAHATNGVIMFRKENALMPNNLHLPVGYGRASSVVSQTPTRRPMQMRPDDSKPPVYGACKLLDMLEL  |     |     |     |                                                              |     |     |     |     |     |
| H. armiger       |  | ELRKRFAISQASATMHLPATIGDYTFYSSRQAHATNGVIMFRKENALMPNNLHLPVGYGRASSVVSQTPTRRPMQMRPDDSKPPVYGACKLLDMLEL  |     |     |     |                                                              |     |     |     |     |     |
| M. fuliginosus   |  | ELRKRFAISQASATMHLPATIGDYTFYSSRQAHATNGVIMFRKENALMPNNLHLPVGYGRASSVVSQTPTRRPMQMRPDDSKPPVYGACKLLDMLEL  |     |     |     |                                                              |     |     |     |     |     |
| M. lucifugus     |  | ELRKRFAISQASATMHLPATIGDYTFYSSRQAHATNGVIMFRKENALMPNNLHLPVGYGRASSVVSQTPTRRPMQMRPDDSKPPVYGACKLLDMLEL  |     |     |     |                                                              |     |     |     |     |     |
| H. ricketti      |  | ELRKRFAISQASATMHLPATIGDYTFYSSRQAHATNGVIMFRKENALMPNNLHLPVGYGRASSVVSQTPTRRPMQMRPDDSKPPVYGACKLLDMLEL  |     |     |     |                                                              |     |     |     |     |     |
| P. ferrumequinum |  | ELRKRFAISQASATMHLPATIGDYTFYSSRQAHATNGVIMFRKENALMPNNLHLPVGYGRASSVVSQTPTRRPMQMRPDDSKPPVYGACKLLDMLEL  |     |     |     |                                                              |     |     |     |     |     |
| C. sphinx        |  | ELRKRFAISQASATMHLPATIGDYTFYSSRQAHATNGVIMFRKENALMPNNLHLPVGYGRASSVVSQTPTRRPMQMRPDDSKPPVYGACKLLDMLEL  |     |     |     |                                                              |     |     |     |     |     |
| N. vampyrus      |  | ELRKRFAISQASATMHLPATIGDYTFYSSRQAHATNGVIMFRKENALMPNNLHLPVGYGRASSVVSQTPTRRPMQMRPDDSKPPVYGACKLLDMLEL  |     |     |     |                                                              |     |     |     |     |     |
| R. leschenaultii |  | ELRKRFAISQASATMHLPATIGDYTFYSSRQAHATNGVIMFRKENALMPNNLHLPVGYGRASSVVSQTPTRRPMQMRPDDSKPPVYGACKLLDMLEL  |     |     |     |                                                              |     |     |     |     |     |
|                  |  | 210                                                                                                | 220 | 230 | 240 | 250                                                          | 260 | 270 | 280 | 290 | 300 |
| Homo sapiens     |  | EMAFFVPGGNRGEPIPIISKAHEHIFGMVLNWSARDIQKWEYVPLGFLGSGFTTISPWVPMALMPFVFNPEQDPKPLPYLRHQDQPTFTDNLIS     |     |     |     |                                                              |     |     |     |     |     |
| Mus musculus     |  | EMAFFVPGGNRGEPIPIISKAHEHIFGMVLNWSARDIQKWEYVPLGFLGSGFTTISPWVPMALMPFVFNPEQDPKPLPYLRHQDQPTFTDNLIS     |     |     |     |                                                              |     |     |     |     |     |
| H. armiger       |  | EMAFFVPGGNRGEPIPIISKAHEHIFGMVLNWSARDIQKWEYVPLGFLGSGFTTISPWVPMALMPFVFNPEQDPKPLPYLRHQDQPTFTDNLIS     |     |     |     |                                                              |     |     |     |     |     |
| M. fuliginosus   |  | EMAFFVPGGNRGEPIPIISKAHEHIFGMVLNWSARDIQKWEYVPLGFLGSGFTTISPWVPMALMPFVFNPEQDPKPLPYLRHQDQPTFTDNLIS     |     |     |     |                                                              |     |     |     |     |     |
| M. lucifugus     |  | EMAFFVPGGNRGEPIPIISKAHEHIFGMVLNWSARDIQKWEYVPLGFLGSGFTTISPWVPMALMPFVFNPEQDPKPLPYLRHQDQPTFTDNLIS     |     |     |     |                                                              |     |     |     |     |     |
| H. ricketti      |  | EMAFFVPGGNRGEPIPIISKAHEHIFGMVLNWSARDIQKWEYVPLGFLGSGFTTISPWVPMALMPFVFNPEQDPKPLPYLRHQDQPTFTDNLIS     |     |     |     |                                                              |     |     |     |     |     |
| P. ferrumequinum |  | EMAFFVPGGNRGEPIPIISKAHEHIFGMVLNWSARDIQKWEYVPLGFLGSGFTTISPWVPMALMPFVFNPEQDPKPLPYLRHQDQPTFTDNLIS     |     |     |     |                                                              |     |     |     |     |     |
| C. sphinx        |  | EMAFFVPGGNRGEPIPIISKAHEHIFGMVLNWSARDIQKWEYVPLGFLGSGFTTISPWVPMALMPFVFNPEQDPKPLPYLRHQDQPTFTDNLIS     |     |     |     |                                                              |     |     |     |     |     |
| N. vampyrus      |  | EMAFFVPGGNRGEPIPIISKAHEHIFGMVLNWSARDIQKWEYVPLGFLGSGFTTISPWVPMALMPFVFNPEQDPKPLPYLRHQDQPTFTDNLIS     |     |     |     |                                                              |     |     |     |     |     |
| R. leschenaultii |  | EMAFFVPGGNRGEPIPIISKAHEHIFGMVLNWSARDIQKWEYVPLGFLGSGFTTISPWVPMALMPFVFNPEQDPKPLPYLRHQDQPTFTDNLIS     |     |     |     |                                                              |     |     |     |     |     |
|                  |  | 310                                                                                                | 320 | 330 | 340 | 350                                                          | 360 | 370 | 380 | 390 | 400 |
| Homo sapiens     |  | VNLKGEQMSQAATICKSNFKMYMTWLQQLTHSVNGCNLRPDGLLASGTISGPEPESFGSMLLSWRGTQALDLSGQTRKFLLDGDDEVITGHCQD     |     |     |     |                                                              |     |     |     |     |     |
| Mus musculus     |  | VNLKGEQMSQAATICKSNFKMYMTWLQQLTHSVNGCNLRPDGLLASGTISGPEPESFGSMLLSWRGTQALDLSGQTRKFLLDGDDEVITGHCQD     |     |     |     |                                                              |     |     |     |     |     |
| H. armiger       |  | VNLKGEQMSQAATICKSNFKMYMTWLQQLTHSVNGCNLRPDGLLASGTISGPEPESFGSMLLSWRGTQALDLSGQTRKFLLDGDDEVITGHCQD     |     |     |     |                                                              |     |     |     |     |     |
| M. fuliginosus   |  | VNLKGEQMSQAATICKSNFKMYMTWLQQLTHSVNGCNLRPDGLLASGTISGPEPESFGSMLLSWRGTQALDLSGQTRKFLLDGDDEVITGHCQD     |     |     |     |                                                              |     |     |     |     |     |
| M. lucifugus     |  | VNLKGEQMSQAATICKSNFKMYMTWLQQLTHSVNGCNLRPDGLLASGTISGPEPESFGSMLLSWRGTQALDLSGQTRKFLLDGDDEVITGHCQD     |     |     |     |                                                              |     |     |     |     |     |
| H. ricketti      |  | VNLKGEQMSQAATICKSNFKMYMTWLQQLTHSVNGCNLRPDGLLASGTISGPEPESFGSMLLSWRGTQALDLSGQTRKFLLDGDDEVITGHCQD     |     |     |     |                                                              |     |     |     |     |     |
| P. ferrumequinum |  | VNLKGEQMSQAATICKSNFKMYMTWLQQLTHSVNGCNLRPDGLLASGTISGPEPESFGSMLLSWRGTQALDLSGQTRKFLLDGDDEVITGHCQD     |     |     |     |                                                              |     |     |     |     |     |
| C. sphinx        |  | VNLKGEQMSQAATICKSNFKMYMTWLQQLTHSVNGCNLRPDGLLASGTISGPEPESFGSMLLSWRGTQALDLSGQTRKFLLDGDDEVITGHCQD     |     |     |     |                                                              |     |     |     |     |     |
| N. vampyrus      |  | VNLKGEQMSQAATICKSNFKMYMTWLQQLTHSVNGCNLRPDGLLASGTISGPEPESFGSMLLSWRGTQALDLSGQTRKFLLDGDDEVITGHCQD     |     |     |     |                                                              |     |     |     |     |     |
| R. leschenaultii |  | VNLKGEQMSQAATICKSNFKMYMTWLQQLTHSVNGCNLRPDGLLASGTISGPEPESFGSMLLSWRGTQALDLSGQTRKFLLDGDDEVITGHCQD     |     |     |     |                                                              |     |     |     |     |     |
|                  |  | 410                                                                                                |     |     |     |                                                              |     |     |     |     |     |
| Homo sapiens     |  | YRVGFGQCAQGRVLPALLDS                                                                               |     |     |     |                                                              |     |     |     |     |     |
| Mus musculus     |  | YRVGFGQCAQGRVLPALSPA                                                                               |     |     |     |                                                              |     |     |     |     |     |
| H. armiger       |  | -----                                                                                              |     |     |     |                                                              |     |     |     |     |     |
| M. fuliginosus   |  | -----                                                                                              |     |     |     |                                                              |     |     |     |     |     |
| M. lucifugus     |  | -----                                                                                              |     |     |     |                                                              |     |     |     |     |     |
| H. ricketti      |  | -----                                                                                              |     |     |     |                                                              |     |     |     |     |     |
| P. ferrumequinum |  | -----                                                                                              |     |     |     |                                                              |     |     |     |     |     |
| C. sphinx        |  | -----                                                                                              |     |     |     |                                                              |     |     |     |     |     |
| N. vampyrus      |  | YRVGFGQCAQGRVLPALSPA                                                                               |     |     |     |                                                              |     |     |     |     |     |
| R. leschenaultii |  | -----                                                                                              |     |     |     |                                                              |     |     |     |     |     |
